# Supplementary material for: Suppression of HSF1 activity by wildtype p53 creates a driving force for p53 loss-of-heterozygosity
Source: PubMed Central journal article supplement (PMC8242083; doi:10.1038/s41467-021-24064-1), 2021-06-29
Supplement: 41467_2021_24064_MOESM1_ESM.pdf [file 41467_2021_24064_MOESM1_ESM.pdf]

# Supplementary information corresponding to:

## **Suppression of HSF1 activity by wildtype p53 creates a driving force for p53 loss-of-heterozygosity**

Tamara Isermann <sup>1</sup>, Özge Çiçek Şener <sup>1,#</sup>, Adrian Stender <sup>1,#</sup>, Luisa Klemke <sup>1</sup>, Nadine Winkler <sup>1</sup>,  
Albrecht Neesse <sup>2</sup>, Jinyu Li <sup>3</sup>, Florian Wegwitz <sup>4</sup>, Ute M. Moll <sup>1,3</sup>  
and Ramona Schulz-Heddergott <sup>1,\*</sup>

- 1) Institute of Molecular Oncology, University Medical Center Göttingen, 37077 Göttingen, Germany
- 2) Department of Gastroenterology, Gastrointestinal Oncology and Endocrinology, University Medical Center Göttingen, 37077 Göttingen, Germany
- 3) Department of Pathology, Stony Brook University, Stony Brook NY 11794, USA
- 4) Department of Gynecology and Obstetrics, University Medical Center Göttingen, 37077 Göttingen, Germany

\* Corresponding author: [ramona.schulz-heddergott@med.uni-goettingen.de](mailto:ramona.schulz-heddergott@med.uni-goettingen.de)

# contributed equally to this work

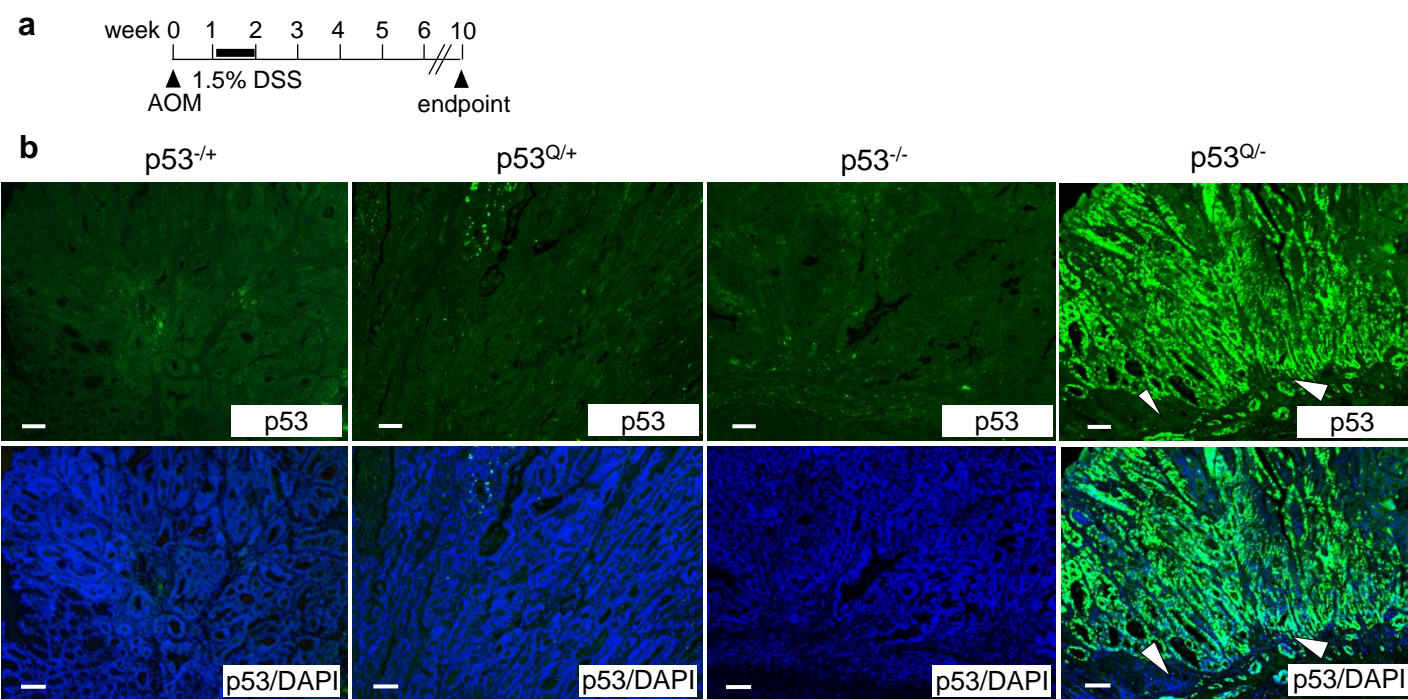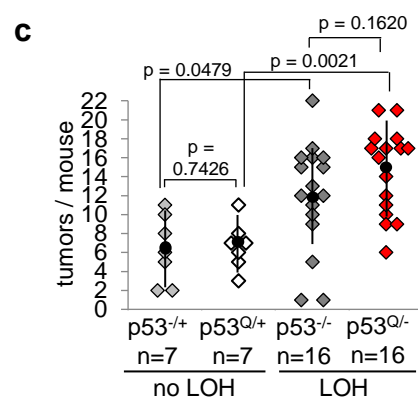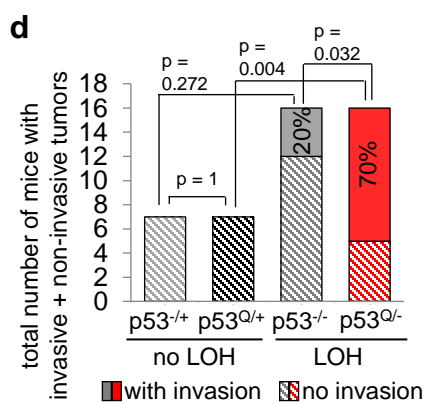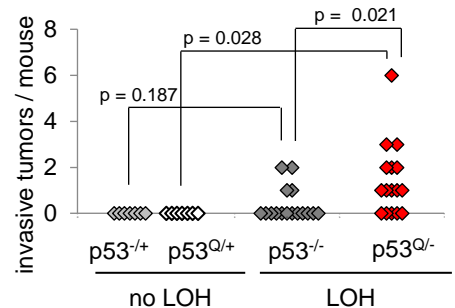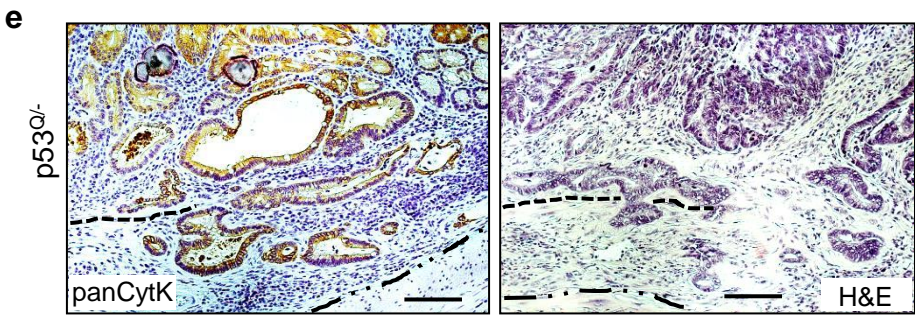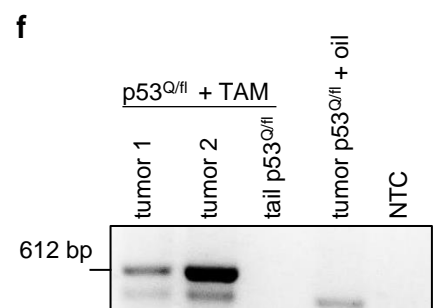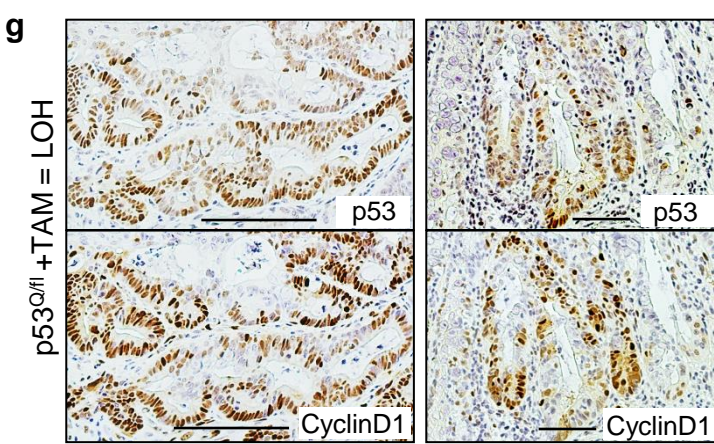

## Supplementary Figure 1. p53 loss-of-heterozygosity is a prerequisite for mutp53 protein stabilization and enables invasion in colorectal cancer

(a) The humanized GOF *TP53*<sup>R248Q</sup> allele (p53<sup>Q</sup>) was paired with the WT p53 allele or the p53null allele<sup>77</sup> in the AOM/DSS colorectal cancer model as we previously described in Schulz-Heddergott et al.<sup>5</sup> to generate heterozygous p53<sup>Q/+</sup> mice (mimicking 'no LOH') and GOF p53<sup>Q/-</sup> mice (mimicking p53LOH), with corresponding controls (p53<sup>-/+</sup> and p53<sup>-/-</sup> mice). All mice were treated with 1.5% DSS. Time line for p53-proficient (containing one WTp53 allele) and p53-deficient (both p53 alleles are altered) mice used in this study. Endpoint analysis at 10 wks for all mice to avoid losing p53-deficient mice to lymphoma and intestinal obstruction.

(b) Representative immunofluorescence for p53 (green) and DAPI (blue) of CRC tumors from the indicated genotypes at endpoint 10 wks. Occasional p53<sup>Q/+</sup> tumors show a minor focus of stabilized mutp53, presumably an area that underwent p53LOH. White arrowheads show invasive malignant glands in bowel wall. Scale bars, 100  $\mu$ m.

(c) Total tumor numbers per mouse of the indicated genotypes at endpoints described in (a). p53<sup>-/+</sup> and p53<sup>Q/+</sup> mice (n = 7 each) harbor heterozygous CRC tumors. Tumors from p53<sup>-/-</sup> and p53<sup>Q/-</sup> mice (n = 16 each) are homozygous for their TP53 alteration mimicking p53LOH. Dots with vertical black lines represent means  $\pm$  SD. p values with Student's t-test, two-sided.

(d) (left) Number of mice analyzed for non-invasive and invasive tumors, and (right) invasive tumors per mouse, from the indicated genotypes at endpoint 10 wks.

(left) Calculation of numbers of mice with invasive tumors. A mouse with at least one invasive tumor was counted as positive. p53<sup>-/+</sup> and p53<sup>Q/+</sup>, n = 7 mice each, p53<sup>-/-</sup> and p53<sup>Q/-</sup>, n = 16 mice each. p values, Fisher's exact tests for indicated group comparisons. (right) Calculation of number of invasive tumors per mouse. p53<sup>-/+</sup> from n = total 42 tumors from 7 mice; p53<sup>Q/+</sup> from n = total 45 tumors from 7 mice; p53<sup>-/-</sup> from n = total 71 tumors from 16 mice and p53<sup>Q/-</sup> from n = total 115 tumors from 16 mice. p values, Student's t-test, two-sided.

(e) Representative sections of p53<sup>Q/-</sup> tumors. panCytK, pan-cytokeratin immunohistochemistry and H&E staining. Dashed line, muscularis mucosae; dashed/dot line, border to muscularis propria. Scale bars, 100  $\mu$ m.

(f) Detection of the colon-specific recombined *Trp53* allele after TAM-induced excision of exons 2–10 (' $\Delta$ ' allele, recombined 612 bp fragment). Genomic PCR using a forward primer upstream of the loxP site in intron 1 and a reverse primer downstream of the loxP site in intron10. NTC, non-template control. Source data are provided as Source Data file.

(g) Representative immunohistochemistry of serial sections for p53 and Cyclin D1 from TAM-treated p53<sup>Q/fl</sup> tumors at 6 wks post-TAM. Tumors show mutp53 stabilization which correlates with Cyclin D1 overexpression. Scale bars, 100  $\mu$ m.

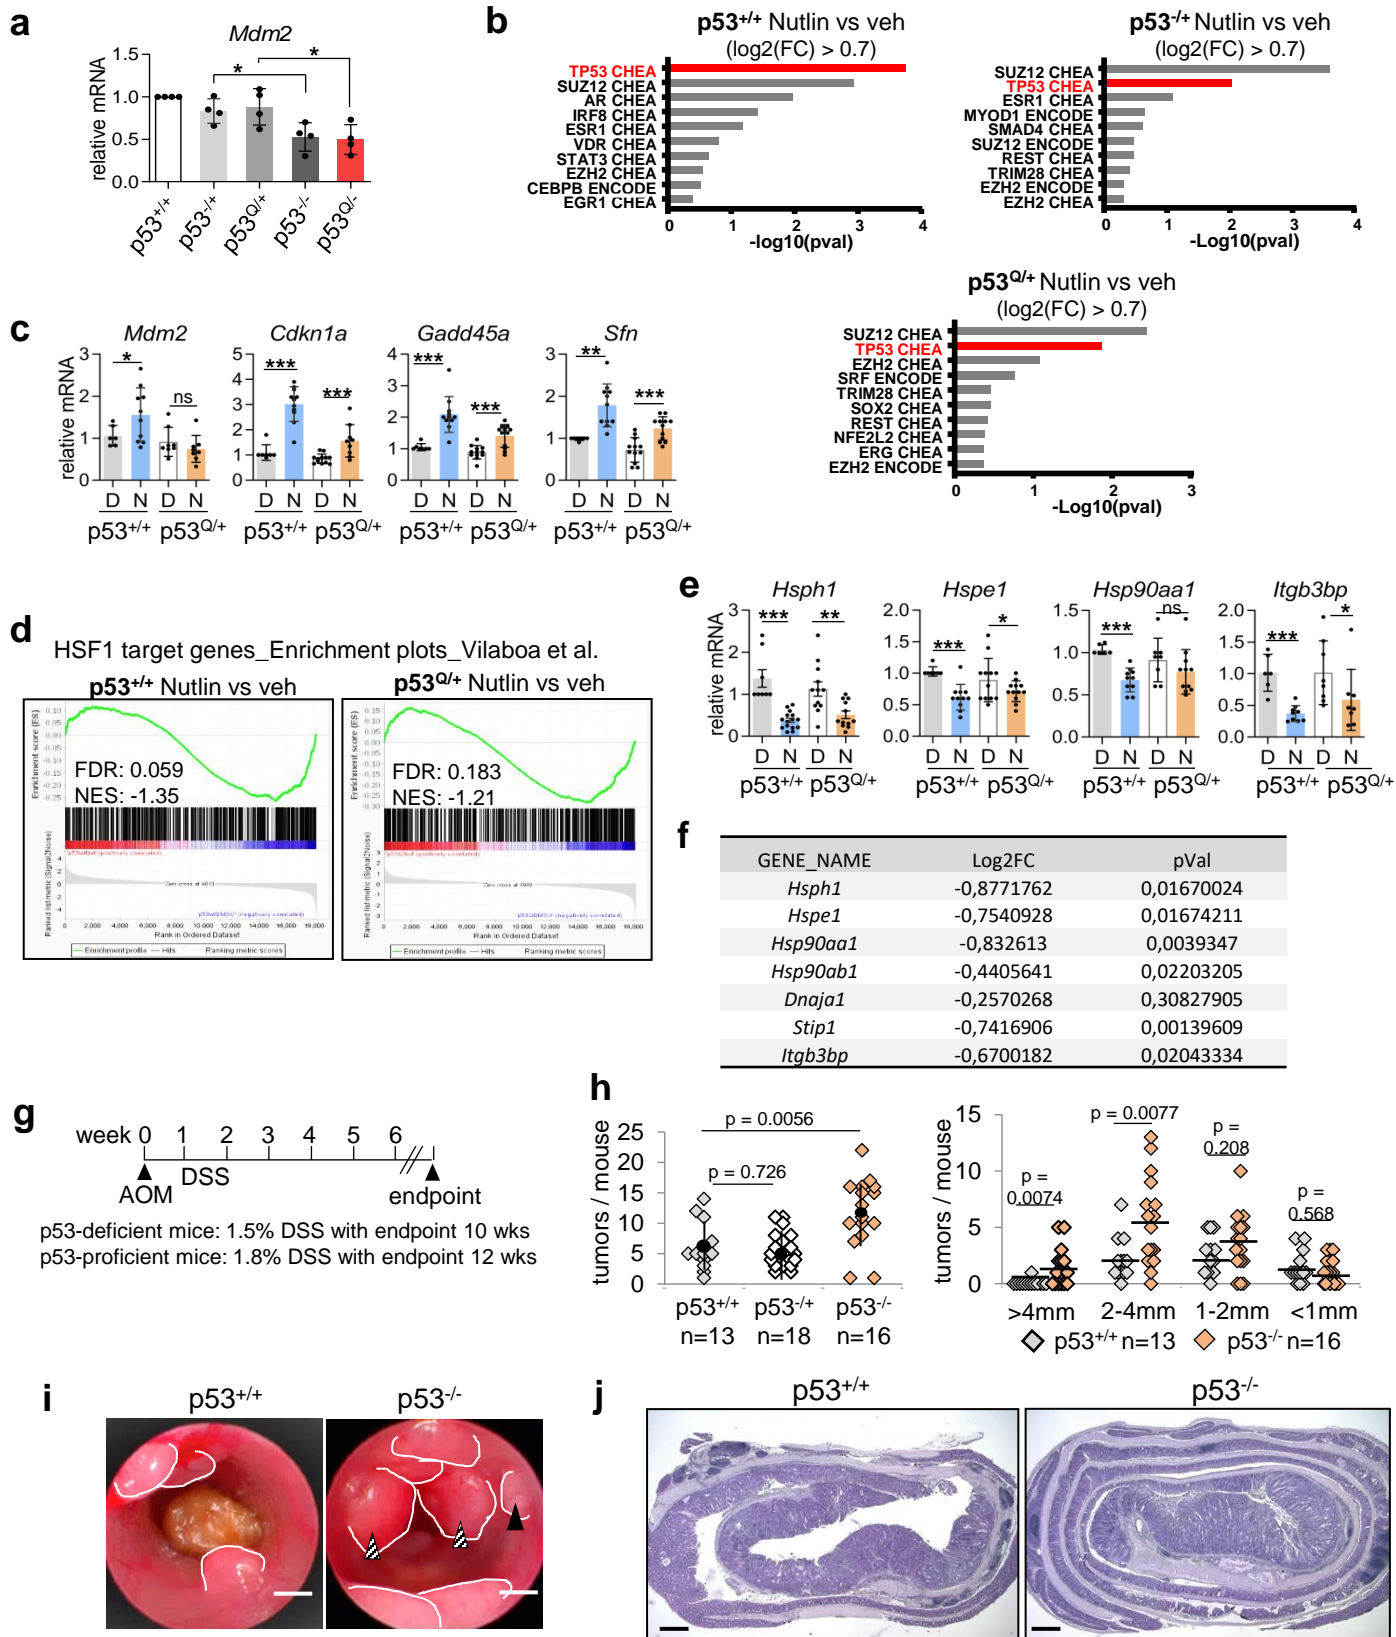

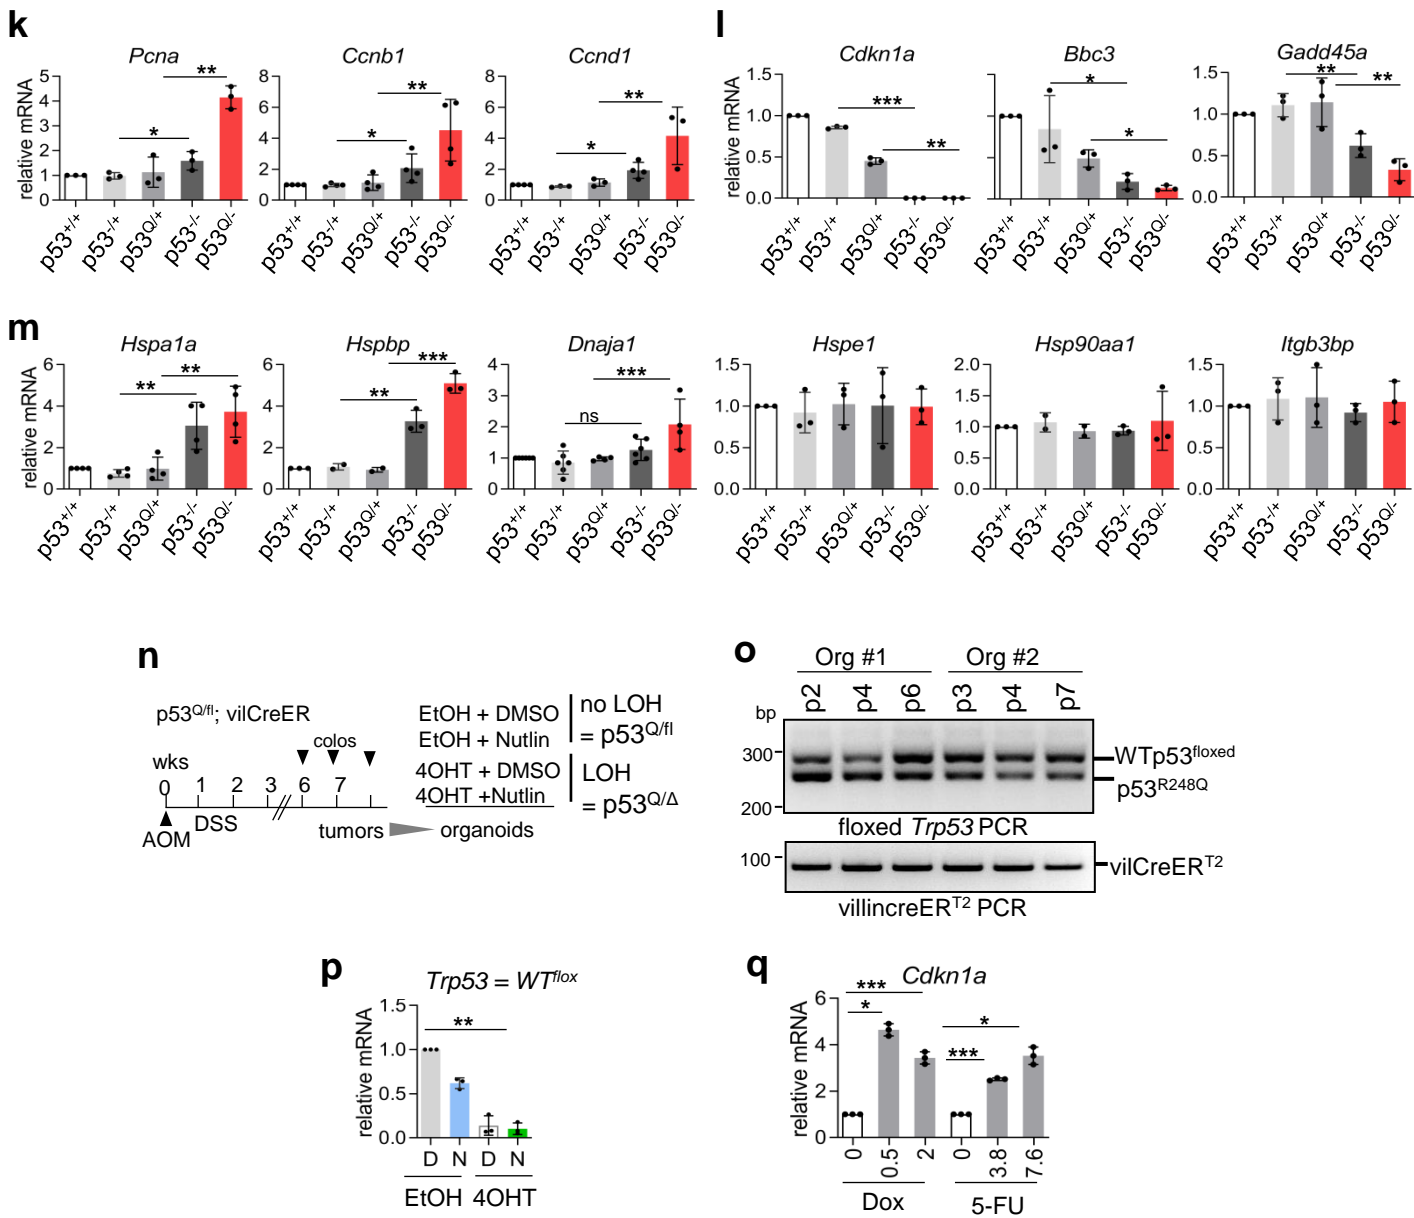

Supp Fig. 2

## Supplementary Figure 2. p53 deletion alone is not sufficient to activate HSF1 *in vivo*

(a) *Mdm2* mRNA levels of untreated CRC tumors ( $\geq 5$  tumors pooled per group). qRT-PCR normalized to *Rplp0* mRNA. Mean  $\pm$  SD of 3 technical replicates (different cDNA synthesis). Student's t-test, two-sided,  $p^* \leq 0.05$ .

(b) RNA-seq analysis of +/- Nutlin treated  $p53^{+/+}$ ,  $p53^{-/-}$  and  $p53^{Q/+}$  tumors from Figure 2b. Upregulated genes (base mean  $> 10$ ,  $\log_2(\text{fold change}) > 0.7$  and  $p\text{-value} < 0.05$ ) were selected for Enrichr analyses (<https://maayanlab.cloud/Enrichr/>).

(c, e) mRNA levels of WTp53 target genes (c) and HSF1 target genes (e) of  $p53^{Q/+}$  and  $p53^{+/+}$  tumors from DMSO (D) and Nutlin (N)-treated mice. Single colonic tumors ( $n = 3\text{-}5$  per group) with 2-3 technical replicates for each tumor were used for qRT-PCR, normalized to *Rplp0* mRNA. Mean  $\pm$  SD.

(d) RNA-seq analysis. Enrichment plots for HSF1 target genes in +/- Nutlin treated  $p53^{+/+}$  and  $p53^{Q/+}$  tumors. HSF1 target gene list from Vilaboa et al. generated from heat shock-induced Hela cells<sup>64</sup>.

(f) Downregulation of individual HSF1 target genes from the RNA-seq analysis in (d).

(g) Scheme of the AOM/DSS colorectal cancer model used in Supplementary Figures 2h-m. Mice of the indicated genotypes were treated with AOM/DSS as outlined. Endpoint analysis at 12 wks for p53-proficient mice to avoid losing them to extraneous reasons such as intestinal obstruction and anal prolapse. Endpoint analysis at 10 wks for p53-deficient mice to avoid losing them to lymphoma.

(h) *left* Total number of colonic tumors per mouse and *right* tumor size distribution of the indicated genotypes.  $n$ , total mouse numbers. *left* Dots with vertical black lines represent means  $\pm$  SD. *right* Horizontal black lines indicate means. Student's t-test, two-sided.

(i) Representative colonoscopy of  $p53^{+/+}$  and  $p53^{-/-}$  mice at endpoint 10 wks post AOM/DSS. White lines outline tumors. Black arrow indicates an S2 tumor and striped arrows indicate S3 tumors. Tumor scoring was performed according to Becker & Neurath<sup>79</sup>. Scale bars, 1 mm.

(j) Colon sections from 'Swiss roles' of AOM/DSS-treated  $p53^{+/+}$  and  $p53^{-/-}$  mice. H&E. Scale bars, 400  $\mu\text{M}$ .

(k, l, m) mRNA levels of cell cycle genes (k), wildtype p53 target genes (l) and HSF1 target genes (m) isolated from the indicated genotypes of colonic tumors (pooled samples,  $n \geq 5$  tumors per genotype). qRT-PCR normalized to *Rplp0* or *Hprt* mRNA. Mean  $\pm$  SEM of  $\geq 3$  technical replicates (different cDNA synthesis).

(n) Scheme for treatment of colonic tumor-derived organoids. Heterozygous  $p53^{Q/fl}$ ; *vilCreER*<sup>T2</sup> mice were treated with AOM/DSS and tumor burden was visualized via colonoscopy. Tumors arisen between 6-8 wks post AOM were resected and processed for colonic organoid cultures. p53LOH was induced by adding 4OHT (4OH-Tamoxifen) for 24 hrs to activate the *CreER*<sup>T2</sup> recombinase and create  $p53^{Q/\Delta}$  organoids. EtOH, control treatment (no-LOH,  $p53^{Q/fl}$ ). Two days after p53LOH induction, organoids were treated with 10  $\mu\text{M}$  Nutlin or DMSO for 24 hrs and harvested for analysis.

(o) The heterozygous p53 genotype in CRC organoids is stable. Two randomly chosen organoid cultures (generated from 2 different heterozygous TP53<sup>R248Q/fl</sup>; vilCreER<sup>T2</sup> mice) were followed during p2-p7 passaging *in vitro*. The p53 floxed allele and the p53<sup>Q</sup> allele are indicated. Source data are provided as Source Data file.

(p) Incomplete recombination after 4OHT. Residual WT *Trp53* mRNA levels detected in colonic organoids after p53LOH induction by 4OHT treatment. Primers to Exon 1 and Exon 4 specific for the murine WTp53 allele were used. qRT-PCR normalized to *Hprt1* mRNA. Mean  $\pm$  SD from  $\geq 3$  independent experiments of  $\geq 3$  cultures.

(q) *Cdkn1a* mRNA levels of heterozygous (no LOH) p53<sup>Q/fl</sup>; vilCreER<sup>T2</sup> organoids as in Figure 2f. Organoids were treated as indicated for 24 hrs. Dox=Doxorubicin, 5-FU= Fluorouracil. qRT-PCR normalized to *Hprt* mRNA. Mean  $\pm$  SD from 2 independent experiments, one includes a technical replicate from the same organoid culture (total n = 3).

(a, c, e, k, l, m, p, q) Relative values are given in [ratio ( $2^{-ddCT}$ )]. Student's t-test, two-sided,  $p^* \leq 0.05$ ,  $p^{**} \leq 0.01$ ,  $p^{***} \leq 0.001$ ; ns, not significant.

**a**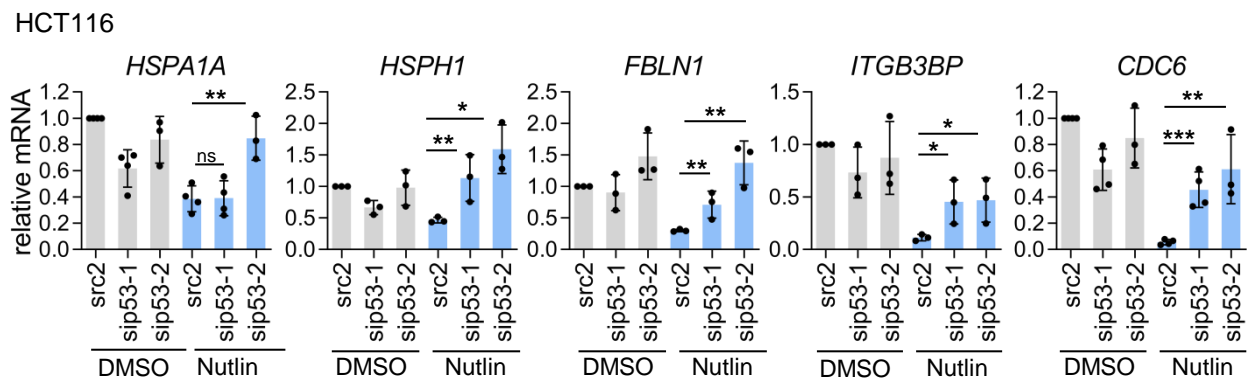**b**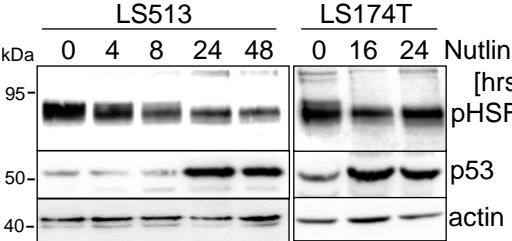**c**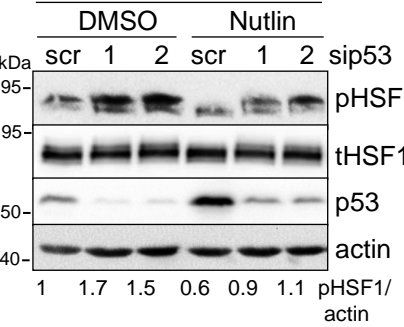**d**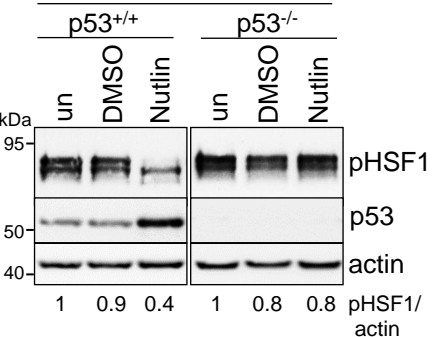**e**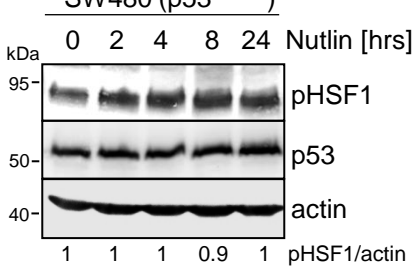**f**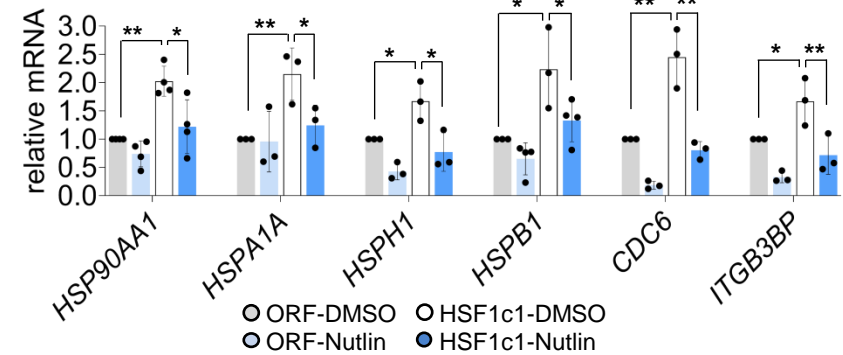

Supp Fig. 3



### Supplementary Figure 3. HSF1 activity is repressed by WTP53 in human colorectal cancer cells

(a) p53-induced HSF1 target gene repression is rescued by WTP53 silencing. WTP53 harboring HCT116 cells were transfected with siRNAs for p53 or scrambled control siRNA (scr2) for 48 hrs. Cells were treated with DMSO or 10  $\mu$ M Nutlin for 24 hrs. qRT-PCRs for the indicated mRNAs were each normalized to *RPLP0* mRNA. Relative values are given in [ratio ( $2^{-\text{ddCT}}$ )]. Mean  $\pm$ SD of 2 independent experiments, each repeated in triplicates. Student's t-test, two-sided.  $p^*=0.05$ ,  $p^{**}=0.01$ ,  $p^{***}=0.001$ ; ns, not significant.

(b) WTP53 harboring LS513 and LS174T cells were treated with DMSO or 10  $\mu$ M Nutlin for the indicated times. Representative immunoblot analysis for pSer326-HSF1, the key marker of HSF1 activity.

(c) p53 silencing abrogates HSF1 inactivation upon Nutlin. HCT116 cells were transfected with two different siRNAs against p53 or scrambled control siRNA (scr). 48 hrs post-transfection, cells were treated with DMSO or 10  $\mu$ M Nutlin for 24 hrs. Cell lysates were immunoblotted for pSer326-HSF1, total HSF1 (tHSF1) and p53.

(d) p53 deletion prevents Nutlin-induced HSF1 inactivation. Isogenic HCT116 cells (p53<sup>+/+</sup> versus p53<sup>-/-</sup> harboring a p53 Exon2 deletion) were left untreated (un) or treated with DMSO or 10  $\mu$ M Nutlin for 24 hrs. Representative immunoblots for pSer326-HSF1 and p53.

(e) mutp53-containing CRC cells fails to reduce pSer326-HSF1 after Nutlin. SW480 cells treated +/- Nutlin (20  $\mu$ M) for the indicated hours. Representative immunoblot.

(f) Stably HSF1-overexpressing HCT116 subclone HSF1c1 and its empty vector clone (ORF) were treated with DMSO or 10  $\mu$ M Nutlin for 24 hrs. qRT-PCR analysis of the indicated HSF1 target genes. Mean  $\pm$  SD of  $\geq 2$  independent experiments, each with technical replicates. Student's t-test, two-sided.  $p^*\leq 0.05$ ,  $p^{**}\leq 0.01$ ; ns.

(b-e) Actin, loading control. pHSF1/actin, pHSF1 densitometry normalized to loading control. Source data are provided as Source Data file.

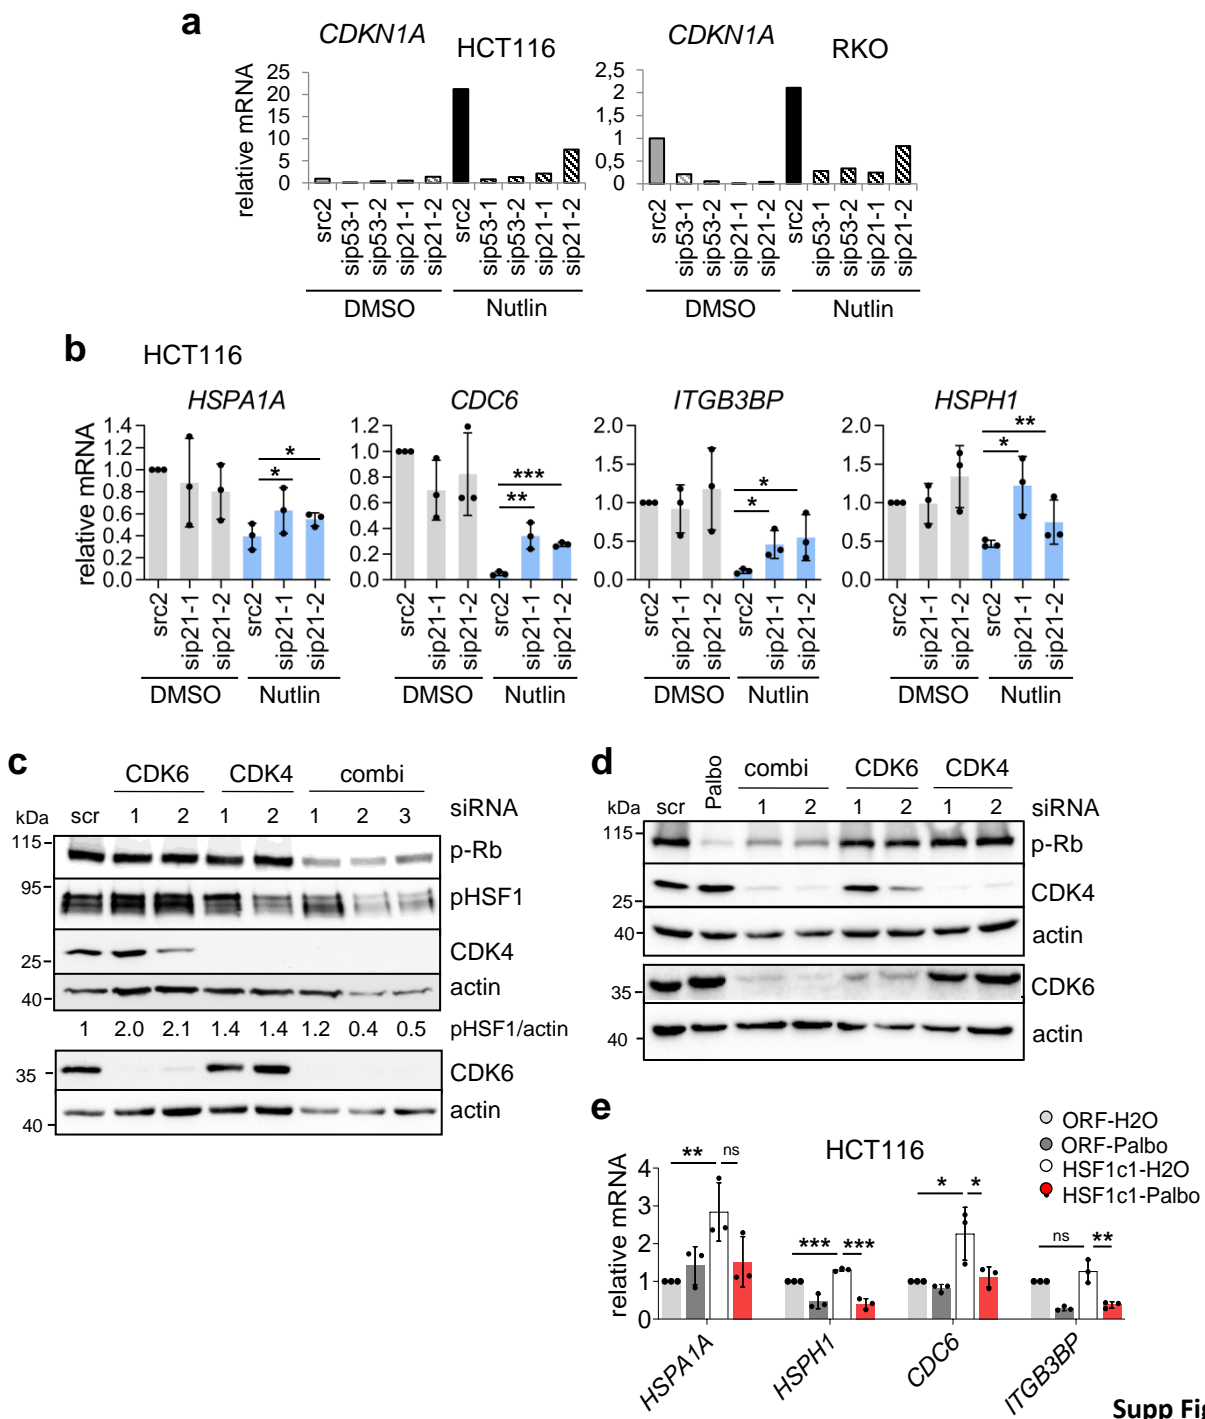

#### Supplementary Figure 4. p53 suppresses HSF1 activity via cyclin-dependent kinase inhibitor *CDKN1A/p21* in human CRC cells

(a) Analysis of *CDKN1A/p21* mRNA expression. qRT-PCRs of HCT116 and RKO cells. Cells were transfected with siRNAs against *CDKN1A/p21* and p53 or scrambled control siRNA (scr2) for 48 hrs, followed by DMSO or 10  $\mu$ M Nutlin treatment for 24 hrs. Relative values of *CDKN1A* mRNA normalized to *RPLP0* mRNA and relative values given in [ratio ( $2^{-\text{ddCT}}$ )].

(b) Analysis of HSF1 target gene expression in HCT116 cells upon depletion of p21. 48 hrs post-transfection with two siRNAs against *CDKN1A/p21* or scrambled control siRNA (scr2), HCT116 cells were treated with DMSO or 10  $\mu$ M Nutlin for 24 hrs. qRT-PCR analysis. Mean  $\pm$ SD of  $\geq 2$  independent experiments, each with technical replicates. Relative values were calculated as in (a).

(c, d) Combined CDK4 and CDK6 silencing lead to HSF1 inactivation. HCT116 cells were transfected with two different siRNAs against CDK4 and/or CDK6 or scrambled control siRNA (scr). 72 hrs post-transfection, cell lysates were immunoblotted as indicated. (D) 10  $\mu$ M Palbociclib for 24 hrs.

(e) Cell cycle inhibition in HSF1-overexpressing HSF1c1 cells strongly suppress HSF1 target gene expression. HSF1c1 or ORF control clones were exposed to H<sub>2</sub>O or Palbociclib (10  $\mu$ M) for 24 hrs. qRT-PCR analysis of the indicated HSF1 target genes. Mean  $\pm$  SD of  $\geq 2$  independent experiments, one with a technical replicate (total n = 3). Relative values given in [ratio ( $2^{-\text{ddCT}}$ )].

(a, b, e) Student's t-test, two-sided.  $p^* \leq 0.05$ ,  $p^{**} \leq 0.01$ ,  $p^{***} \leq 0.001$ ; ns, not significant.

(c, d) Actin, loading control. pHSF1/actin, pHSF1 densitometry normalized to loading control. Source data are provided as Source Data file.

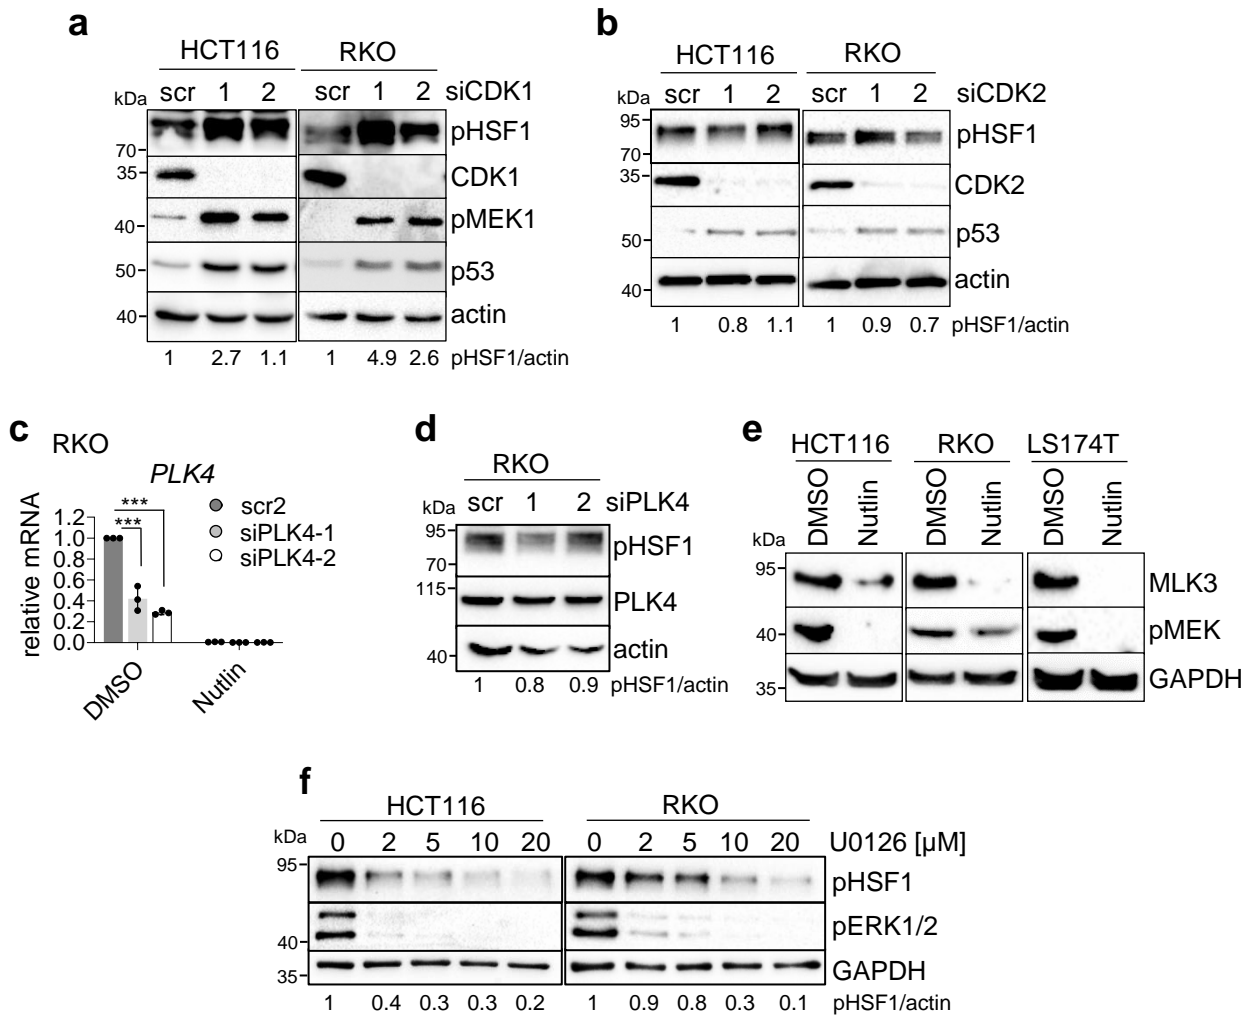

Supp Fig. 5

## Supplementary Figure 5. Cell cycle aberrations activate the MEK pathway and regulate HSF1 activity

(a, b) Depletion of CDK1 (a) and CDK2 (b) fail to abrogate pSer326-HSF1 phosphorylation. The indicated cells were transfected with two different siRNAs each. 72 hrs post-transfection cell lysates were analyzed by immunoblots. Actin, loading control.

(c) *PLK4* silencing in RKO cells. Cells were transfected with two different siRNAs against *PLK4* or scrambled control siRNA (scr) for 72 hrs. qRT-PCRs for *PLK4* mRNAs normalized to *RPLP0* mRNA. Relative values given as ratio ( $2^{-\Delta\Delta CT}$ ). Mean  $\pm$ SD of 2 independent experiments, one with a technical replicate (total n = 3). Student's t-test, two-sided.  $p^* \leq 0.05$ ,  $p^{**} \leq 0.01$ ,  $p^{***} \leq 0.001$ .

(d) Despite *PLK4* silencing (c), *PLK4* protein and pSer326-HSF1 levels are stable, excluding *PLK4* as HSF1-activating kinase. Immunoblot analysis of RKO cells from (c).

(e) Activated WTP53 strongly reduces MLK3 protein levels. The indicated CRC cells were treated with DMSO or 10  $\mu$ M Nutlin for 36 hrs. Immunoblot analysis. Actin, loading control. Source data are provided as Source Data file.

(f) MEK inhibition suppresses HSF1 phosphorylation. HCT116 and RKO cells were treated for 24 hrs with DMSO or U0126 at the indicated concentrations. Immunoblot analysis. pERK1/2, functional control for MEK1 inhibition. GAPDH, loading control.

(a, b, d, f) pHSF1/actin, pHSF1 densitometry normalized to loading control. Source data are provided as Source Data file.

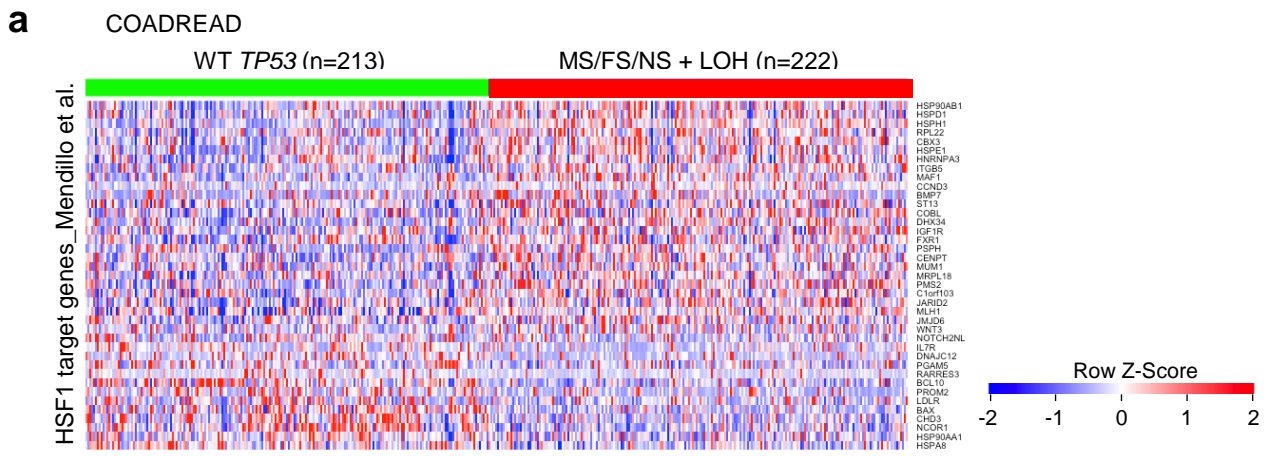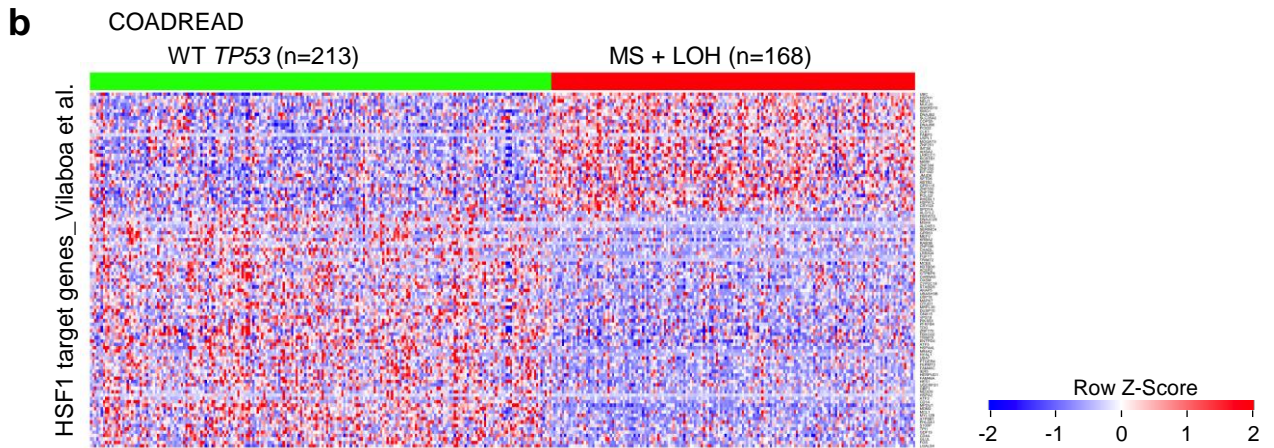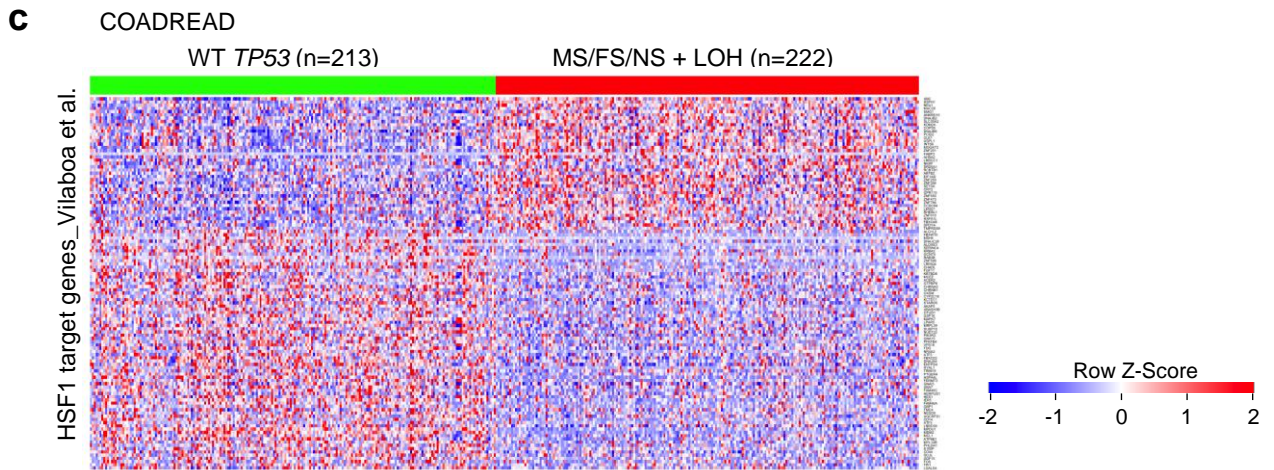

**d**

| n = 433  | WT <i>TP53</i> | MS/NS/FS + LOH |
|----------|----------------|----------------|
| p < .001 |                |                |
| N0       | 147            | 102            |
| N1A/B/C  | 37             | 76             |
| N2A/B    | 29             | 42             |

  

| n = 430   | WT <i>TP53</i> | MS/NS/FS + LOH |
|-----------|----------------|----------------|
| p = .0418 |                |                |
| M0/X      | 192            | 180            |
| M1/1A     | 19             | 34             |
| M1B       | 0              | 4              |

**e**

| n = 293   | WT <i>TP53</i>  | MS/NS/FS + LOH   |
|-----------|-----------------|------------------|
| p = .0042 | <i>HSF1</i> low | <i>HSF1</i> high |
| N0        | 82              | 88               |
| N1A/B/C   | 21              | 59               |
| N2A/B     | 17              | 26               |

  

| n = 289   | WT <i>TP53</i>  | MS/NS/FS + LOH   |
|-----------|-----------------|------------------|
| p = .0018 | <i>HSF1</i> low | <i>HSF1</i> high |
| M0/X      | 114             | 143              |
| M1/1A     | 5               | 26               |
| M1B       | 0               | 1                |

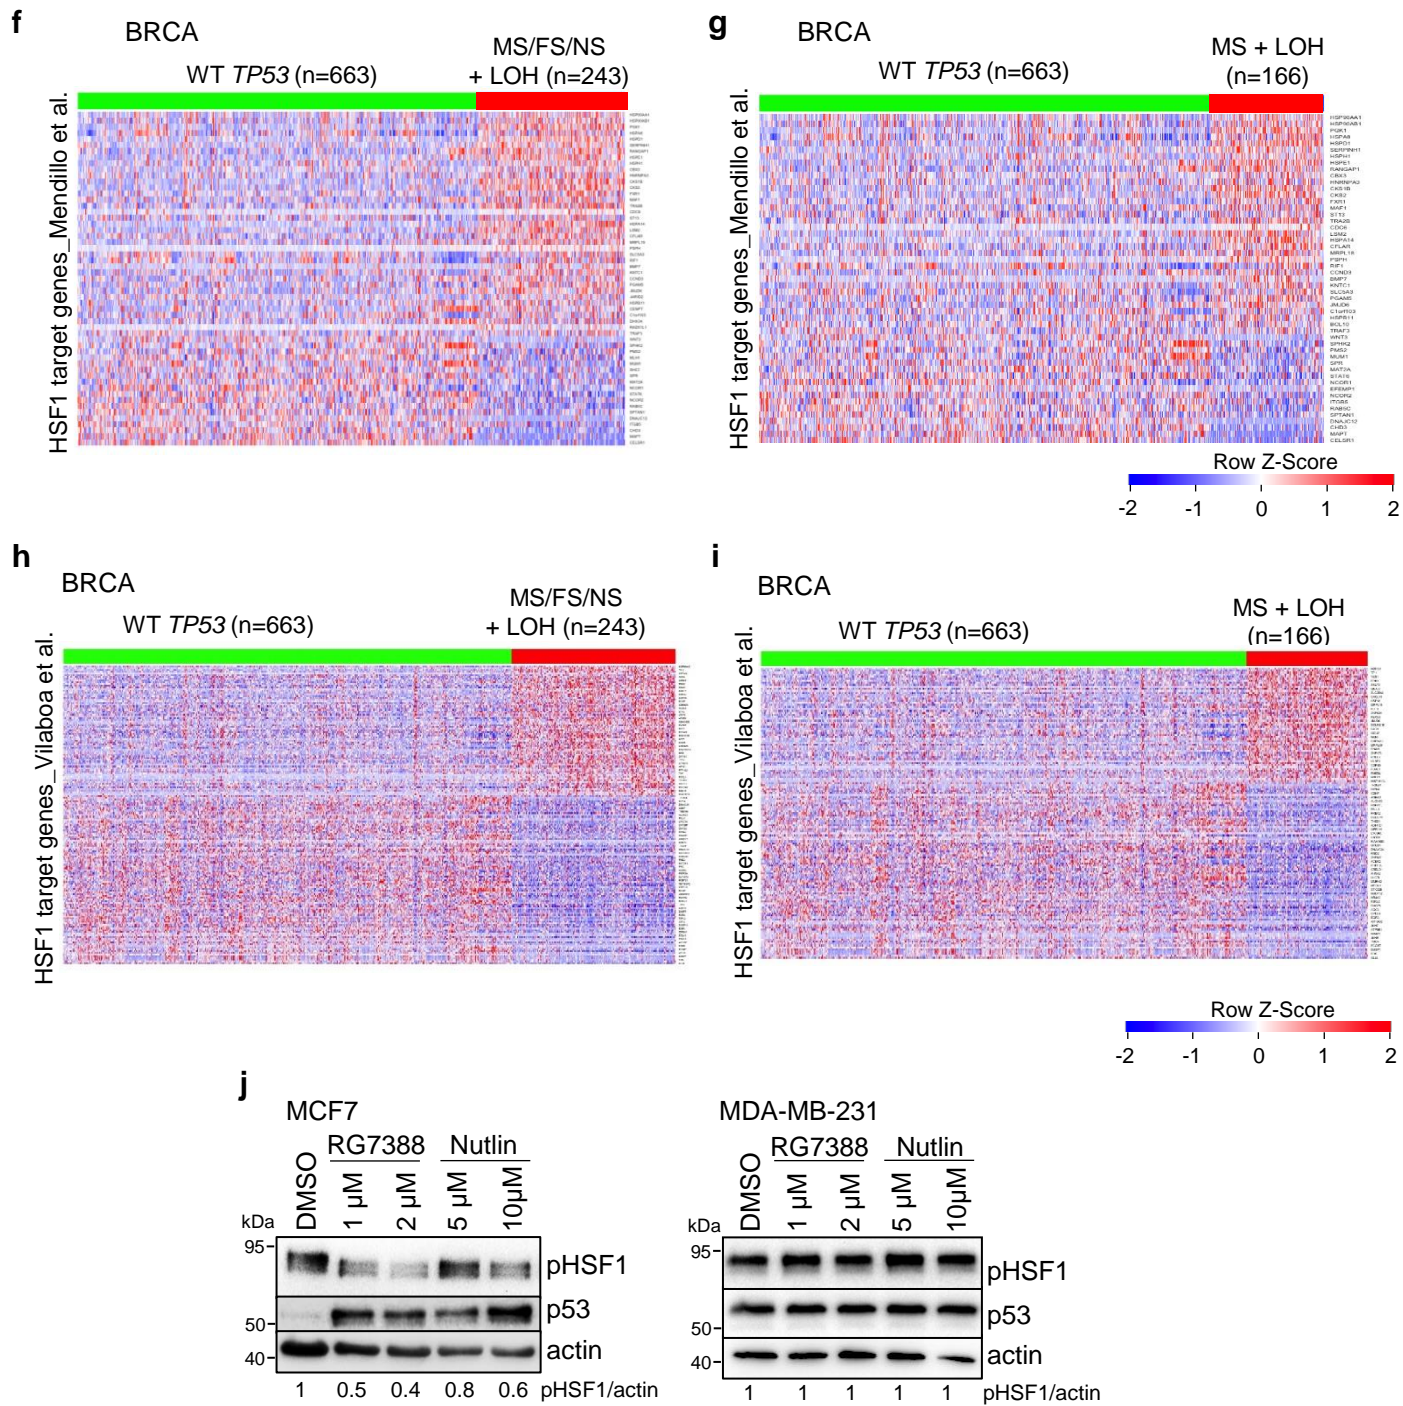

Supp Fig. 6

## Supplementary Figure 6. In colorectal and breast cancer patients p53LOH combined with p53 missense mutations upregulates HSF1 activity

(a) Heatmap of HSF1 target genes analyzed from colorectal adenocarcinoma patients (COADREAD cohort, TCGA database). Patients harboring homozygous TP53<sup>+/+</sup> (WT TP53) were compared to patients harboring all TP53 mutations (MS, missense; FS, frameshift; NS, nonsense) plus p53LOH (shallow deletions) (called MS/FS/NS + LOH). Genes were ordered from top to bottom by their relative Z-scores (upregulation red, downregulation blue) and their log-ranked p-values. A stringently curated HSF1 target gene panel based on HSF1 knockdown and integrated ChiP-seq/RNA-seq criteria from Mendillo et al was used<sup>46</sup>.

(b, c) Heatmaps of HSF1 target genes as analyzed in (a). Patients harboring homozygous TP53<sup>+/+</sup> (WT TP53) were compared to patients harboring missense TP53 mutation (MS) plus p53LOH (B) or all TP53 mutations (MS, missense; FS, frameshift; NS, nonsense) plus p53LOH (shallow deletions) (called MS/FS/NS + LOH) (c). Broad HSF1 target gene list from Vilaboa et al was used<sup>64</sup>.

(d) Correlation between the p53 mutation status to lymph node stages (N0, N1A/B/C and N2A/B) and metastasis stages (M0/X, M1/1A and M1B) of CRC patients. Patients harboring MS/FS/NS mutations combined with shallow deletions (MS/FS/NS+LOH) were compared to patients with WT TP53. Patient numbers are indicated. Chi-square statistics.

(e) Correlation of CRC patients with WT TP53 and HSF1<sup>low</sup> or MS/NS/FS+LOH and HSF1<sup>high</sup> to the N and M stages as in (d). Patient numbers as indicated. Chi-square statistics.

(f, g) Heatmap of HSF1 target genes analyzed from breast cancer patients (BRCA cohort, TCGA database). Patients with homozygous WT TP53 were compared to patients with MS/FS/NS + LOH. Genes were ordered from top to bottom by their relative Z-scores (upregulation red, downregulation blue) and their log-ranked p-values. The HSF1 target gene panel as in (a).

(h, i) Heatmap of HSF1 target genes analyzed from breast cancer patients (BRCA cohort, TCGA database) as analyzed in (f, g). The HSF1 target gene panel as in (b, c).

(j) Breast cancer cells repress pSer326-HSF1 when harboring WTp53 but not mutp53. MCF7 cells harboring homozygous WTp53 and MDA-MB-231 cells harboring homozygous mutp53 R280K were treated with DMSO, Nutlin or Idasanutlin (RG7388) for 24 hrs as indicated. Representative immunoblot analysis. Actin, loading control. pHSF1/actin, pHSF1 densitometry normalized to loading control. Source data are provided as Source Data file.



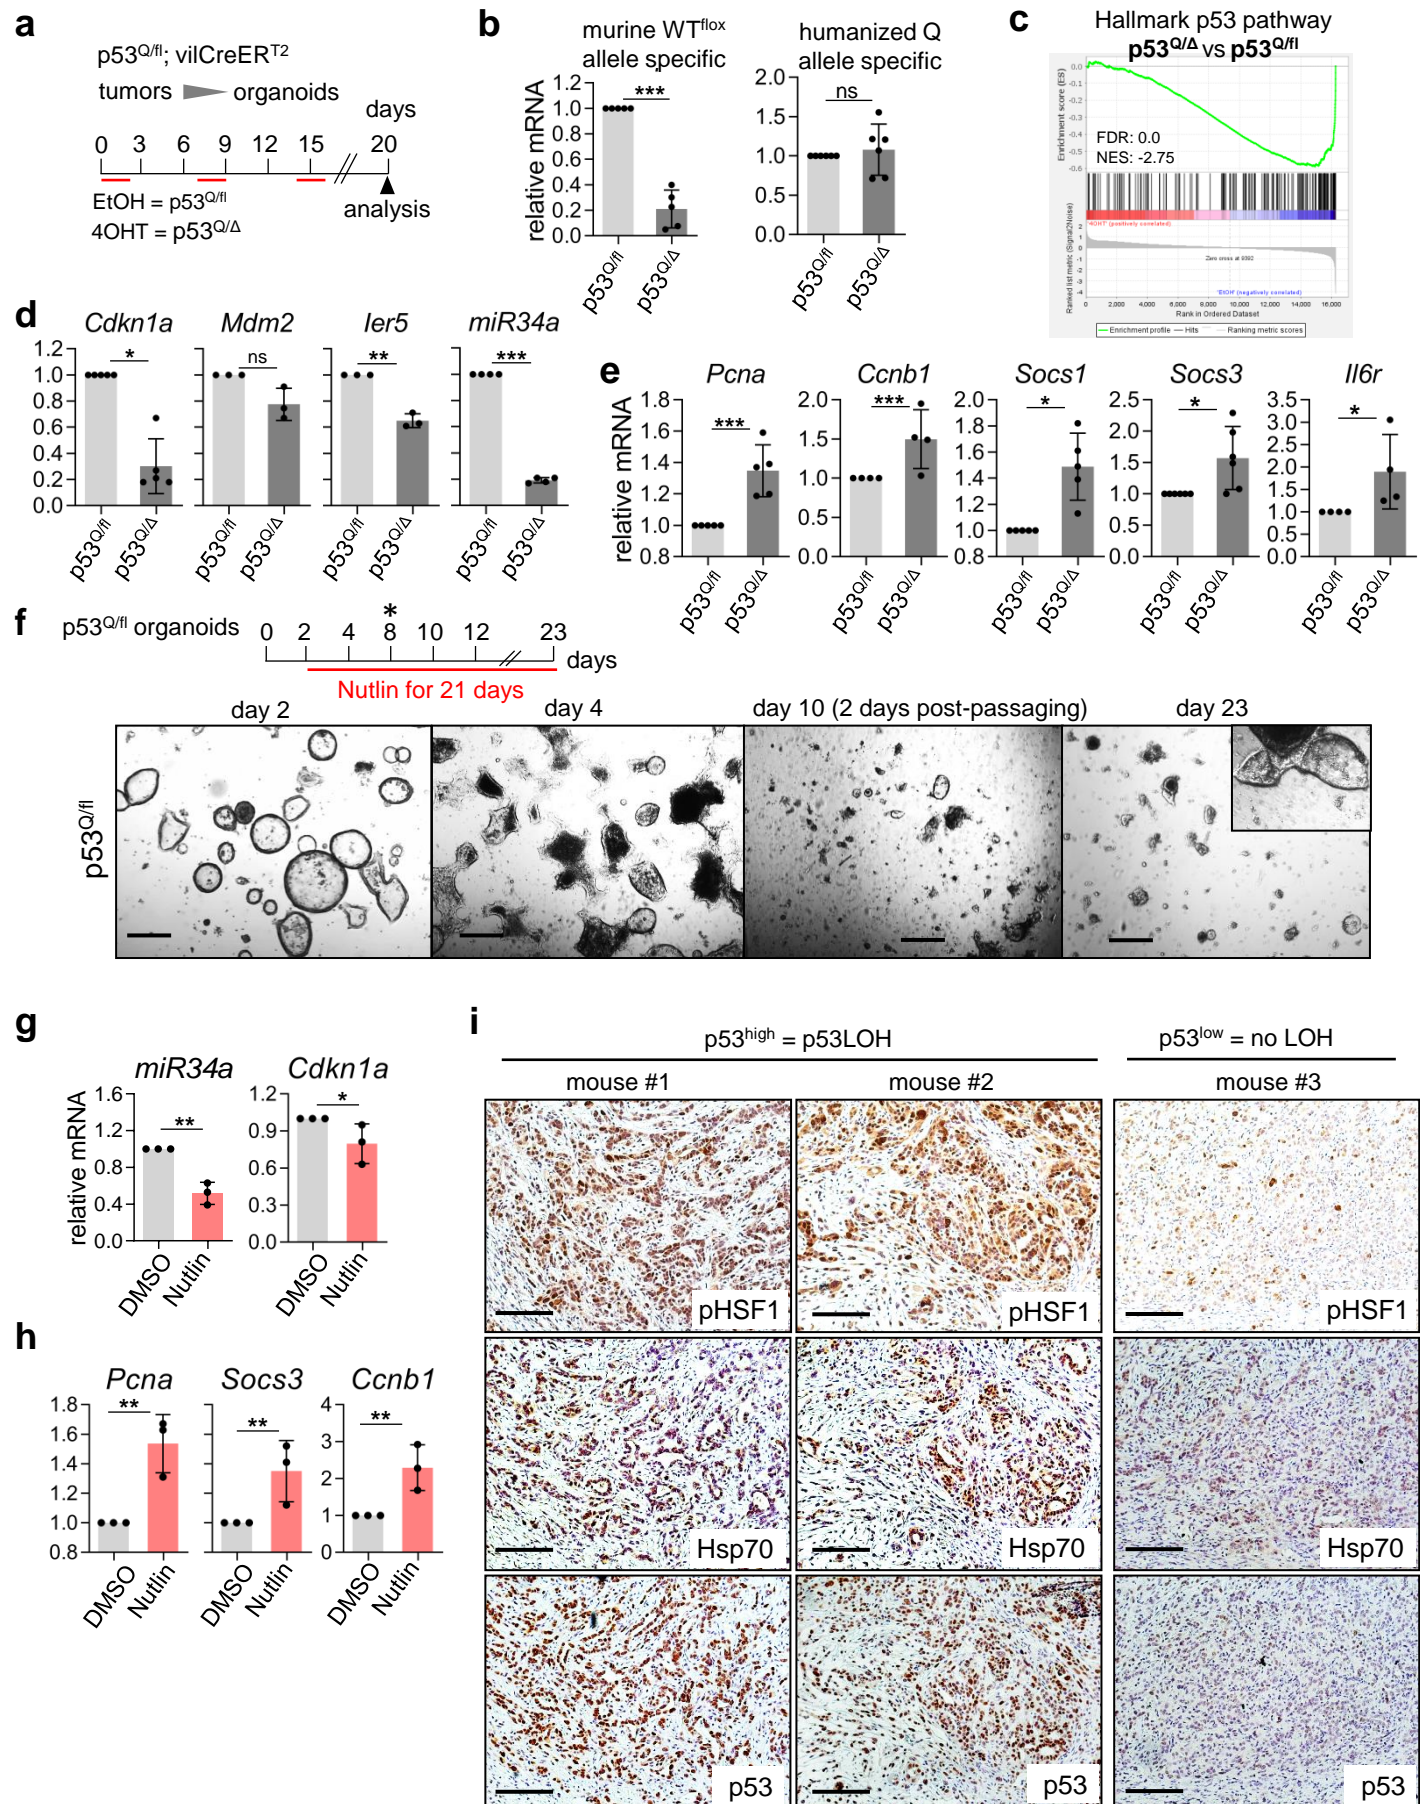

## Supplementary Figure 7. Analysis of heterozygous CRC organoids

(a) Treatment scheme used in (b-d) for 'long-term p53LOH' ( $p53^{Q/\Delta}$ ) of  $p53^{Q/fl}; vilCreER^{T2}$  organoids over 20 days, induced by adding weekly 4OHT for 48 hrs (red lines). EtOH, control (no LOH,  $p53^{Q/fl}$ ).

(b) Validation of induced p53LOH after 20 days and 3 weekly pulses of 4OHT. mRNA levels of the murine wildtype *Trp53* allele and the humanized *TP53* Q allele of heterozygous  $p53^{Q/fl}; vilCreER^{T2}$  organoids treated as in (a). qRT-PCR using species-specific primers, normalized to *Hprt1* mRNA.

(c) RNA-seq analysis of organoids subjected to long-term p53LOH generated in (a). GSEA enrichment plot for the hallmark p53 gene set sorted by NES.

(d, e) mRNA levels of the indicated p53 target genes (d) and proliferative Stat3 target genes (e) in heterozygous  $p53^{Q/fl}; vilCreER^{T2}$  organoids treated as in (a). qRT-PCR normalized to *Hprt1* or *Rplp0* mRNA.

(f) Long-term chronic Nutlin treatment of heterozygous  $p53^{Q/fl}; vilCreER^{T2}$  organoids provides selection pressure to induce spontaneous p53LOH. Two days after plating, organoids were treated with 5 $\mu$ M Nutlin/DMSO for 21 days. At day 8 dead organoids induced by Nutlin-activated WTp53 (marked as black structures with complete loss of integrity of the outer epithelial barrier) were removed by splitting the cultures (passaging). Subsequently many organoids, presumably those that had undergone p53LOH, were able to regrow and show invasive morphologic structures with branchings and protrusions. Representative images of different times are shown. Scale bars, 200  $\mu$ M.

(g, h) Long-term chronic Nutlin treatment to mimic chronic stress for spontaneous p53LOH. mRNA levels of p53 targets (g) and proliferative Stat3 target genes (h) from heterozygous  $p53^{Q/fl}; vilCreER^{T2}$  organoids. qRT-PCR normalized to *Hprt1* mRNA. Mean  $\pm$  SD from 2 independent experiments, one includes a technical replicate from the same organoid culture (total n = 3).

(i) Serial sections of three representative pancreatic KPC tumors immunostained for p53, pHSF1 and Hsp70. Scale bars, 100  $\mu$ m.

(b, d, e) Mean  $\pm$  SD from  $\geq 3$  independent experiments of  $\geq 3$  cultures.

(b, d, e, g, h) Student's t-test, two-sided.  $p^* \leq 0.05$ ,  $p^{**} \leq 0.01$ ,  $p^{***} \leq 0.001$ ; ns, not significant.

Supplementary Table 1, related to online Methods:: Reagents and Resources

| REAGENT or RESOURCE                                                             | SOURCE         | IDENTIFIER                     |
|---------------------------------------------------------------------------------|----------------|--------------------------------|
| <b>Antibodies</b>                                                               |                |                                |
| Rabbit polyclonal anti-p53 (FL-393)                                             | Santa Cruz     | Cat# sc-6243; RRID:AB_653753   |
| Goat polyclonal anti- $\alpha$ SMA                                              | Abcam          | Cat# ab21027, RRID:AB_1951138  |
| Mouse monoclonal anti-E-Cadherin                                                | BD Biosciences | Cat# 610181; RRID:AB_397580    |
| Mouse monoclonal anti-p53 (DO-1)                                                | Santa Cruz     | Cat# sc-126; RRID:AB_628082    |
| Rabbit monoclonal phospho-Ser326-HSF1                                           | Abcam          | Cat# ab76076; RRID:AB_1310328  |
| Rabbit monoclonal phospho-Ser326-HSF1 (for murine IHC)                          | Bioss          | Cat# bsm-52166R                |
| Rabbit polyclonal anti-HSF1 (H-311)                                             | Santa Cruz     | Cat# sc-9144; RRID:AB_2120276  |
| Rabbit monoclonal anti-HSP27 (E1J4D)                                            | Cell Signaling | Cat# 50353; RRID:AB_2799374    |
| Rabbit polyclonal anti-Heat Shock Protein 90 $\alpha$                           | Millipore      | Cat# 07-2174; RRID:AB_10807022 |
| Rabbit polyclonal anti-Hsp70                                                    | Cell Signaling | Cat# 4872; RRID:AB_2279841     |
| Rabbit polyclonal anti-AKT                                                      | Cell Signaling | Cat# 9272; RRID:AB_329827      |
| Mouse monoclonal anti-beta-actin                                                | Abcam          | Cat# ab6276; RRID:AB_2223210   |
| Rabbit polyclonal anti-c-Raf                                                    | Cell Signaling | Cat# 9422; RRID:AB_390808      |
| Rabbit monoclonal anti-p21 Waf1/Cip1 (12D1)                                     | Cell Signaling | Cat# 2947; RRID:AB_823586      |
| Rabbit monoclonal anti-phospho-Rb (Ser807/811) (D20B12) XP                      | Cell Signaling | Cat# 8516; RRID:AB_11178658    |
| Rabbit polyclonal anti-phospho-Ser235/236-S6 ribosomal protein                  | Cell Signaling | Cat# 2211; RRID:AB_331679      |
| Rabbit monoclonal anti-MLK3 [EP1460Y]                                           | Abcam          | Cat# ab51068; RRID:AB_881140   |
| Rabbit polyclonal phospho-p-MEK-1/2 (Ser 218/Ser 222)                           | Santa Cruz     | Cat# sc-7995; RRID:AB_2234805  |
| Rabbit monoclonal anti-phospho-p44/42 MAPK (Erk1/2) (Thr202/Tyr204) [D13.14.4E] | Cell Signaling | Cat# 4370, RRID:AB_2315112     |
| Mouse monoclonal anti-GAPDH                                                     | Abcam          | Cat# ab8245; RRID:AB_2107448   |

|                                                      |                               |                                  |
|------------------------------------------------------|-------------------------------|----------------------------------|
| Mouse monoclonal anti-Cdc2 p34                       | Santa Cruz                    | Cat# sc-54; RRID:AB_627224       |
| Rabbit monoclonal anti-CDK2                          | Abcam                         | Cat# ab32147; RRID:AB_726775     |
| Rabbit monoclonal anti-CDK4                          | Abcam                         | Cat# ab68266; RRID:AB_11155340   |
| Rabbit monoclonal anti-CDK6                          | Cell Signaling                | Cat# 3136; RRID:AB_2229289       |
| Rabbit monoclonal anti-CyclinD1                      | Abcam                         | Cat# ab134175; RRID:AB_2750906   |
| Rabbit polyclonal anti-PLK4                          | Protein Technologies          | Cat# 12952-1-AP; RRID:AB_2284150 |
| Alexa Fluor®488 Goat anti-rabbit IgG (H+L)           | ThermoFisher                  | Cat# A-11034; RRID:AB_2576217    |
| Alexa Fluor®488 Donkey anti-mouse IgG (H+L)          | ThermoFisher                  | Cat# A-21202; RRID:AB_141607     |
| Alexa Fluor®546 Donkey anti-rabbit IgG (H+L)         | ThermoFisher                  | Cat# A-10040; RRID:AB_2534016    |
| ImmPRESS™ Peroxidase polymer reagent                 | VectorLabs                    | Cat# MP-7401, RRID:AB_2336529    |
| <b>Bacterial and Virus Strains</b>                   |                               |                                  |
| Bacteria: ElectroMAX DH10B cells                     | Invitrogen/Thermo Fisher Sci. | Cat# 18290-015                   |
| <b>Chemicals, Peptides, and Recombinant Proteins</b> |                               |                                  |
| AOM (Azoxymethane)                                   | Sigma Aldrich                 | Cat# A5486                       |
| DSS (Dextran sodium sulfate)                         | MP Biomedicals                | Cat# 160110                      |
| TAM (Tamoxifen)                                      | Sigma Aldrich                 | Cat# T5648                       |
| (Z)-4-Hydroxytamoxifen (4-OHT)                       | Sigma Aldrich                 | Cat# H7904                       |
| Lipofectamine2000                                    | Invitrogen                    | Cat# 11668-019                   |
| Trizol                                               | Invitrogen                    | Cat# 15596026                    |
| Phusion® High-Fidelity DNA Polymerase                | Thermo Fisher Sci.            | Cat# F530                        |
| U0126                                                | Cell Signaling                | Cat# 9903S                       |
| PD 0332991 isethionate (Palbociclib)                 | Sigma Aldrich                 | Cat# PZ0199                      |
| RO-3306                                              | Sigma Aldrich                 | Cat# SML0569                     |
| Roscovitine                                          | Cell Signaling                | Cat# 9885                        |
| RG-7112                                              | SelleckChem                   | Cat# S7030                       |

|                            |              |                  |
|----------------------------|--------------|------------------|
| Idasanutlin (RG-7388)      | SelleckChem  | Cat# S7205       |
| Nutlin-3a (MDM2 inhibitor) | BOC Sciences | Cat# 675576-98-4 |
| 5-Fluorouracil             | Sigma        | Cat# F6627       |
| Doxorubicin                | Santa Cruz   | Cat# sc-200923   |
| Passive Lysis Buffer, 5X   | Promega      | Cat# E194A       |

### Experimental Models: Cell Lines

|                                                  |                    |                          |
|--------------------------------------------------|--------------------|--------------------------|
| HCT116                                           | ATCC               | Cat# ATCC® CCL-247™      |
| HCT116-ORF                                       | this work          | N/A                      |
| HCT116-HSF1c1                                    | this work          | N/A                      |
| HCT116-HSF1c2                                    | this work          | N/A                      |
| RKO                                              | ATCC               | Cat# ATCC® CRL-2577™     |
| LS513                                            | ATCC               | Cat# ATCC® CRL-2134™     |
| HCT116 p53 <sup>-/-</sup>                        | Bunz et al., 1998. | B. Vogelstein, Baltimore |
| HCT116 p53 <sup>+/+</sup>                        | Bunz et al., 1998. | B. Vogelstein, Baltimore |
| LS174T                                           | DSMZ               | Cat# ACC 759             |
| SW480                                            | DSMZ               | Cat# ACC 313             |
| MCF-7                                            | DSMZ               | Cat# ACC 115             |
| MDA-MB-231                                       | DSMZ               | Cat# ACC 732             |
| HEK 293 Cell Line human (for viral transfection) | DSMZ               | Cat# 85120602            |

### Experimental Models: Organisms/Strains

|                                                                    |                                                |                    |
|--------------------------------------------------------------------|------------------------------------------------|--------------------|
| Mouse: p53 <sup>LoxP</sup> (p53 <sup>fl</sup> )                    | Jonkers J et al., 2001                         | Jax strain# 008462 |
| Mouse: p53null (-/-) (B6.129S2-Trp53 <sup>&lt;tm1Tyj&gt;</sup> /J) | Jacks T et al., 1994 or The Jackson Laboratory | Jax strain# 002101 |
| Mouse: p53 <sup>R248Q</sup>                                        | Hanel et al., 2013                             | N/A                |
| Mouse: p53 <sup>flloxR248Q</sup> (p53 <sup>flloxQ</sup> )          | Alexandrova et al., 2015                       | N/A                |
| Mouse: villin:CreER <sup>1,2</sup>                                 | N/A                                            | Jax strain# 020282 |
| Mouse: C57BL/6NJ                                                   | N/A                                            | Jax strain# 005304 |

|                                                            |                             |                                     |
|------------------------------------------------------------|-----------------------------|-------------------------------------|
| KPC mouse                                                  | Hasselluhn et al. 2020      | PMID: 31878349                      |
| <b>Oligonucleotides</b>                                    |                             |                                     |
| Primers for QPCR and genotyping, see below                 | this paper                  | Table S1.                           |
| siRNA MLK3 Silencer® Select                                | Ambion                      | Pool of IDs: 8814+8815+8816         |
| siRNA CDC2 Silencer® Select                                | Ambion                      | ID: 464                             |
| siRNA CDC2 Silencer® Select                                | Ambion                      | ID: 465                             |
| siRNA CDK2 Silencer® Select                                | Ambion                      | ID: 205                             |
| siRNA CDK2 Silencer® Select                                | Ambion                      | ID: 206                             |
| siRNA CDK4 Silencer® Select                                | Ambion                      | ID: s2824                           |
| siRNA CDK4 Silencer® Select                                | Ambion                      | ID: s2822                           |
| siRNA CDK6 Silencer® Select                                | Ambion                      | ID: s51                             |
| siRNA CDK6 Silencer® Select                                | Ambion                      | ID: s53                             |
| siRNA PLK4 Silencer® Select                                | Ambion                      | ID: 21083                           |
| siRNA PLK4 Silencer® Select                                | Ambion                      | ID: 21084                           |
| siRNA TP53 Silencer® Select                                | Ambion                      | ID: s605                            |
| siRNA TP53 Silencer® Select                                | Ambion                      | ID: s607                            |
| siRNA CDKN1A Silencer® Select                              | Ambion                      | ID: 415                             |
| siRNA CDKN1A Silencer® Select                              | Ambion                      | ID: 417                             |
| siRNA Negative Control No. 2 (src2) Silencer® Select siRNA | Ambion                      | Cat# 4390847                        |
| <b>Recombinant DNA</b>                                     |                             |                                     |
| pSUPER control vector for shRNA                            | OligoEngine                 | Cat# VEC-PBS-0002                   |
| pSUPER-p53 for shp53                                       | OligoEngine                 | Cat# VEC-P53-0001                   |
| pMD2.G                                                     | Addgene                     | Plasmid #12259                      |
| pCMV-R8.91                                                 | PlasmidFactory<br>Bielefeld | Kramer et al., 2017. PMID: 27834954 |
| Precision LentiORF positive control                        | Dharmacon                   |                                     |

|                                                    |                         |                                                                                                                               |
|----------------------------------------------------|-------------------------|-------------------------------------------------------------------------------------------------------------------------------|
| Precision LentiORF HSF1 w/o Stop Codon, Lentiviral | Dharmacon               | Catalog# OHS5898-202620209; Clone Id: PLOHS_100008319                                                                         |
| pGL4.41[ <i>luc2P/HSE/Hygro</i> ] vector           | Promega                 | Cat# E3751                                                                                                                    |
| pRL Renilla Luciferase Control Reporter Vectors    | Promega                 | Cat# E2241                                                                                                                    |
| Software and Algorithms                            |                         |                                                                                                                               |
| ImageJ software                                    | Open source             | <a href="https://imagej.net/Welcome">https://imagej.net/Welcome</a><br>PMID 22930834                                          |
| GraphPadPRISM®                                     | Graphpad Software, Inc. | <a href="https://www.graphpad.com/">https://www.graphpad.com/</a>                                                             |
| Image Lab™ Software                                | Biorad                  | <a href="http://www.bio-rad.com/de-de/product/image-lab-software">http://www.bio-rad.com/de-de/product/image-lab-software</a> |

Supplementary Table 2, related to online Methods: Primers for qPCR and genotyping.

| Gene                     | Origin | Forward                       | Reverse                       |
|--------------------------|--------|-------------------------------|-------------------------------|
| <b>qPCR</b>              |        |                               |                               |
| <i>HSP90AA1</i>          | Human  | 5'-GCCCAGAGTGCTGAATACCC       | 5'-GTGGAAGGGCTGTTCCAGA        |
| <i>HSPA1A</i>            | Human  | 5'-TCAAGGGCAAGATCAGCGAG       | 5'-TGATGGGGTTACACACCTGC       |
| <i>HSPH1</i>             | Human  | 5'-ACTGCTTGTTCAAGAGGGCTGTGA   | 5'-AACATCCACACCCACACACATGCT   |
| <i>HSPB1</i>             | Human  | 5'-GGAGTGGTCGCGAGTGGTTAG      | 5'-ATGTAGCCATGCTCGTCCTG       |
| <i>CDC6</i>              | Human  | 5'-TAAAAGCCCTGCCTCTCAGC       | 5'-TGAGTGAGGGGGACCATTCT       |
| <i>ITGB3BP</i>           | Human  | 5'-TCCCGAATCTCAGAATGCCTG      | 5'-TGACAAGTTCAGTTGTTGGAG      |
| <i>RBBP5</i>             | Human  | 5'-AACTCAGCCAGCCCTTGAC        | 5'-GGCCACATGATGGCAAAGTG       |
| <i>BST2</i>              | Human  | 5'-AGGAGCTTGAGGGAGAGATCA      | 5'-AGGACGGACCTTCCAAGATG       |
| <i>RPLP0 (36B4)</i>      | Human  | 5'-GATTGGCTACCCAAGTGTG        | 5'-CAGGGGCAGCAGCCACAAA        |
| <i>TP53</i>              | Human  | 5'-AAGTCTAGAGCCACCGTCCA       | 5'-CAGTCTGGCTGCCAATCCA        |
| <i>FBNL1</i>             | Human  | 5'-CCGCAACTGCCAAGACATTGAT     | 5'-GACCGTGTCTGTCTTCTCCTG      |
| <i>CDKN1A</i>            | Human  | 5'-TAGGCGGTTGAATGAGAGG        | 5'-AAGTGGGGAGGAGGAAGTAG       |
| <i>CDK1</i>              | Human  | 5'-TTTTCAGAGCTTTGGGCACT       | 5'-CCATTTTGCCAGAAATTCGT       |
| <i>CDK2</i>              | Human  | 5'-GGATGCCTCTGCTCTCACTG       | 5'-ACAGGGTCACCACCTCATGG       |
| <i>CDC25c</i>            | Human  | 5'-GTATCTGGGAGGACACATCCAGGG   | 5'-CAAGTTGGTAGCCTGTTGGTTTG    |
| <i>PLK4</i>              | Human  | 5'-CAAGCGGCGGGAGATTTTCA       | 5'-CAGCTCTGTAGACACCAGCAA      |
| <i>MLK3</i>              | Human  | 5'-CACACCCCCAGCACTCAAT        | 5'-CGTCTTGAGCGAGAAGCAGA       |
| <i>STIP1</i>             | Human  | 5'-CCGACCTTCATCAAGGGTTATAC    | 5'-GGTTGTAAGTGCAGCCATCATA     |
| <i>DNAJA1</i>            | Human  | 5'-ACCCAAATGAAGGAGAGAAGGTAAA  | 5'-GTACCTCGGCAATTGGGACA       |
| <i>DNAJB1</i>            | Human  | 5'-TCGGACGAGGAGATCAAGCG       | 5'-AACATGGCATGAGGGTCTCC       |
| <i>HSF1</i>              | Human  | 5'-AAGGAGGTGCTGCCCAAGTA       | 5'-ACTCCGTGTCGTCTCTCTCT       |
| <i>Trp53 (Ex4-Ex5)</i>   | Human  | 5'-GTTTCCGCTCTGGGCTTCTT       | 5'-GTGCTGTGACTGCTTGTAGAT      |
| <i>Trp53 (Ex1-Ex3/4)</i> | Mouse  | 5'-GTGCTCACCCCTGGCTAAAAGT     | 5'-CAGTGAGGTGATGGCAGGAT       |
| <i>Ccnd1</i>             | Mouse  | 5'-GGAGCTGCTGCAAATGGAAC       | 5'-CAGTCCGGGTCACACTTGA        |
| <i>Ccnb1</i>             | Mouse  | 5'-CAGGGTCGTGAAGTGAAGTGG      | 5'-GGCACACAAGTCTTCTGCAT       |
| <i>Mdm2</i>              | Mouse  | 5'-TAG CAG CCA AGA AAG CGT GA | 5'-ATG AGG TGT CCA GTC TTG CC |
| <i>Pcna</i>              | Mouse  | 5'-AGTGGAGAGCTTGCCAATGG       | 5'-TCAGGTACCTCAGAGCAAACG      |
| <i>Cdkn1a (p21)</i>      | Mouse  | 5'-GTGGCCTTGTGCTGTCTT         | 5'-GCGCTTGAGTGATAGAAATCTG     |
| <i>Gadd45a</i>           | Mouse  | 5'-GGCGTGTACGAGGCTGCCAA       | 5'-TGTCGTTCTCGCAGCAGAACG      |
| <i>Bbc3</i>              | Mouse  | 5'-TTCTCCGGAGTGTTCATGCC       | 5'-ATACAGCGGAGGGCATCAGG       |
| <i>Puma</i>              | Mouse  | 5'-CCTGTCACCAGCCAGCAGC        | 5'-CCCTCCAGGGTGAGGGTC         |
| <i>Sfn</i>               | Mouse  | 5'-GCCCGGTCAGCCTACCAGGA       | 5'-CGGCTGTCCACAGCGTCAGG       |
| <i>MLK3</i>              | Mouse  | 5'-TCCGCCTCTCACAACAACA        | 5'-ATACGGCTACGGAGTGGTGA       |



|                                                                                            |        |                                        |                                        |
|--------------------------------------------------------------------------------------------|--------|----------------------------------------|----------------------------------------|
| IER5                                                                                       | Mouse  | 5'-CACCGACGAGGAGATGGAGA                | 5'-AGTCCCAGAGAAGCTAGACCC               |
| Zmat3                                                                                      | Mouse  | 5'-AGAGTCACTCATTCTCGGAC                | 5'-GAACTCCACCTCTTCGCCAG                |
| Pai1                                                                                       | Mouse  | 5'-ACTTCACAAGTCTTTCCGACCAAG            | 5'-GGCCCATGAAGAGGATTGTC                |
| HspH1                                                                                      | Mouse  | 5'-AGACCATCGCCAACGAGTTC                | 5'-ACATGACCTTTATTCCCACGC               |
| HspE                                                                                       | Mouse  | 5'-GGAGTGCTGCCGAAACTGTA                | 5'- CCAACTTTCACACTGACAGGC              |
| Hsp90AA1                                                                                   | Mouse  | 5'-CGTCTCGTGCGTGTTTCATTC               | 5'-CCAGAGCGTCCGATGAATTG                |
| Hsp90AB1                                                                                   | Mouse  | 5'-TCTAATGCTTCAGATGCCTGG               | 5'-CGTGCCAGACTTAGCAATGG                |
| HspA1A                                                                                     | Mouse  | 5'- GATTTGTTTTGCAGGACAGC               | 5'-GGGGAGAGTCCAAACACAAA                |
| HspA2                                                                                      | Mouse  | 5'-TCAAGCGCCTCACCCAATA                 | 5'-GGAGACATCCTGACTGGTCG                |
| DNAJA1                                                                                     | Mouse  | 5'-AGGGTCATGGAGAACGCATC                | 5'-GGCTCCAGTCTGGTTCTTG                 |
| STIP1                                                                                      | Mouse  | 5'-CCCAAGCCAGAACCAATGGA                | 5'-TCTCAAAGTGCACAGCTGCTT               |
| SOCS1                                                                                      | Mouse  | 5'-CGAGTAGGATGGTAGCACGC                | 5'-AAGGTGCGGAAGTGAGTGTC                |
| SOCS3                                                                                      | Mouse  | 5'-TGTCGGAAGACTGTCAACGG                | 5'-AGGAAGAAGCCAATCTGCC                 |
| Itgb3bp                                                                                    | Mouse  | 5'-GTATACAGGCTTTGGAGGGCA               | 5'-TGACAGTTGTCAGACTGAAGGT              |
| pre-miR34a                                                                                 | Mouse  | 5'-GGTAGGGTCCACTACACATCTTTC            | 5'-CTAGGGCAGTATACTTGCTGATTG            |
| Snai1                                                                                      | Mouse  | 5'-CTTGTGTCTGCACGACCTG                 | 5'-GGTTGGAGCGGTGAGCAAA                 |
| Vim                                                                                        | Mouse  | 5'-GGATCAGCTCACCAACGACA                | 5'-AAGGTCAAGACGTGCCAGAG                |
| Zeb1                                                                                       | Mouse  | 5'-TTCTCTCCACTGTGAATCCGT               | 5'-TTGCTCACCTGCCCGTATTG                |
| Snai2                                                                                      | Mouse  | 5'-GGCTGCTTCAAGGACACATT                | 5'-GTGCCCTCAGGTTTGATCTG                |
| Hprt1                                                                                      | Mouse  | 5'-GCTTCTCCTCAGACCGCTT                 | 5'-CCAGCAGGTCAGCAAAGAACT               |
| RplpO (36B4)                                                                               | Mouse  | 5'-GCAGATCGGGTACCCAAGTGT               | 5'-CAGCAGCCGCAAATGCAGATG               |
| <b>genotyping</b>                                                                          |        |                                        |                                        |
| <i>Trp53</i> <sup>R248Q</sup> = WT                                                         | Mouse  | 5'-GGAAGTCCTTTGCCCTGAA                 | 5'-CACTGAAAAAGACCTGGCAACC              |
| <i>TP53</i> <sup>R248Q</sup> = humanized Q                                                 | Hu/Mus | 5'-AAGGGTGCAGTTATGCCTCA (Human)        | ~                                      |
| <i>Trp53</i> (X6-X7) = WT                                                                  | Mouse  | 5'-AGCGTGGTGGTACCTTATGAGC              | 5'-GGATGGTGGTATACTCAGAGCC              |
| <i>Trp53</i> (neo-X7) = Del                                                                | Mouse  | 5'-GCTATCAGGACATAGCGTTGGC              | ~                                      |
| <i>villinCreER</i> <sup>T2</sup> = transgene                                               | Mouse  | 5'-CAA GCC TGG CTC GAC GGC C           | 5'- CGC GAA CAT CTT CAG GTT CT         |
| <i>Trp53</i> <sup>flax</sup> = WT and floxed site in intron 1 of <i>Trp53</i><br>(F1 - R1) | Mouse  | 5'- GGT TAA ACC CAG CTT GAC CA<br>(F1) | 5- GGA GGC AGA GAC AGT TGG AG<br>(R1)  |
| <i>Trp53</i> <sup>flax</sup> = recombined<br>(F1 and R10)                                  | Mouse  | 5'- GGT TAA ACC CAG CTT GAC CA<br>(F1) | 5- GAA GAC AGA AAA GGG<br>GAG GG (R10) |
