# Supplementary material for: Suppression of HSF1 activity by wildtype p53 creates a driving force for p53 loss-of-heterozygosity
Source: PubMed Central journal article supplement (PMC8242083; doi:10.1038/s41467-021-24064-1), 2021-06-29
Supplement: 41467_2021_24064_MOESM3_ESM.pdf [file 41467_2021_24064_MOESM3_ESM.pdf]

## **Description of Additional Supplementary Files**

File Name: Supplementary Data 1

Description: HSF1 UP gene list\_after HS\_HeLa
